# Supplementary material for: FOXL2 down-regulates vitellogenin expression at mature stage in Eriocheir sinensis
Source: Oxford University Press journal article supplement (doi:10.1042/bsr20150151), 2015-10-02
Supplement: bsr035e278-sup-bsr035e275add.pdf [file bsr035e278-sup-bsr035e275add.pdf]

1 **Supplemental figure legends**

2 **Supplemental Fig. S1.** Nucleotide sequence and deduced amino acid sequence of  
3 FOXL2 in *E. sinensis* (Es-FOXL2). The underlined sequences indicate the forkhead  
4 domain of the FOX family. The initiation and stop codons are in bold.

5

6 **Supplemental Fig. S2.** Multiple alignment of FOXL2 amino acid sequences from *E.*  
7 *sinensis* and other representative invertebrates and vertebrates. The sequence  
8 alignment was performed with software ClustalX software. The forkhead domain and  
9 the alanine polymer region are marked in red boxes. The green boxes indicate the  
10 nuclear localization signal. The sequences were downloaded from NCBI with  
11 following accession numbers: *Homo sapiens*: P58012, *Mus musculus*: Q2TVT7,  
12 *Gallus gallus*: Q5J7N5, *Rattus norvegicus*: D4A0S1, *Bos Taurus*: Q6VFT7,  
13 *Oryctolagus cuniculus*: Q6VFT5, *Xenopus tropicalis*: F7E8K4, *Danio rerio*:  
14 NP\_001038717.1, *Strongylocentrotus purpuratus*: ABB89483.1.

15

16 **Supplemental Fig. S3.** Phylogenetic analysis of Es-FOXL2 and FOXL2 homologs  
17 from other invertebrates and vertebrates. The phylogenetic tree was constructed using  
18 the neighbor-joining method in Mega 4.0 software. Numbers in the phylogram nodes  
19 indicate percent bootstrap, and the bar at the bottom indicates 5% amino acid  
20 divergence in sequence.

21

22 **Supplemental Fig. S4.** Nucleotide and deduced amino acid sequence of FTZ-F1 in *E.*  
23 *sinensis* (Es-FTZ-F1). The DNA binding domain and the ligand binding domain are  
24 shown in bold and italicized, respectively. The two zinc fingers (amino acid residues  
25 33–53 for ZF1 and 69–88 for ZF2) are boxed. The underlined region is the FTZ-F1  
26 box. The AF2 core is shown in a bold box.

27

28 **Supplemental Fig. S5.** Phylogenetic analysis of Es-FTZ-F1 and other members of the  
29 NR5As subfamily. The phylogenetic tree was constructed using the neighbor-joining  
30 method in Mega 4.0 software. Numbers in the phylogram nodes indicate percent  
31 bootstrap, and the bar at the bottom indicates 10% amino acid divergence in sequence.

32

33 **Supplemental Fig. S6.** Particle Nucleotide and deduced amino acid sequence of  
34 DDX20 in *E. sinensis*.

35

36 **Supplemental Fig. S7.** Analysis of recombinant forkhead domain protein. (A)  
37 Recombinant plasmid amplified by PCR; M, marker; RP, recombinant pET-32a-EsFH  
38 plasmid; D, plasmid digested by *EcoRI* and *XhoI* restriction enzymes. The band at ~5  
39 kb is the empty plasmid, and the lower band is the forkhead domain sequence (not  
40 observed due to low concentration). (B) Recombinant forkhead domain protein  
41 analysed by Coomassie Blue staining. M, marker; Un, lysates of BL21 cells with  
42 recombinant pET-32a-EsFH plasmid; In, BL21 cells with recombinant pET-32a-EsFH  
43 plasmid induced with IPTG. (C) Forkhead domain protein analysed by western blot.  
44 FH, forkhead domain protein; EP, empty plasmid.

45 **Supplemental figures**

46 **Supplemental Fig. S1.**

```

10      20      30      40      50      60
1      GAGTACATGAGCCCTTCCGCCTACGAGAGTCAATGACATAAAATCCTACGACAAAATGTAC
1      M S P S A Y E S H D I K S Y D K M Y
70      80      90      100     110     120
61     TCGTCGAAGAGCCACTTGGAGTCTCCGATTGATGACTCTTCGTATGACAAGTGTGCGAC
19     S S K S H L E S P I D D S S Y D K C C D
130     140     150     160     170     180
121    AAGACCTACAAGACCCTCGAGAGCTGGACCCTAACAGAAGCCGCCCTATTCTTACGTG
39     K T Y K T L E T L D P N K K P P Y S Y V
190     200     210     220     230     240
181    GCGCTTATCACCATGGCGATCAAGGAGAGCCCGGAGCGGAGACTGCAGCTGAGCGAGATC
59     A L I T M A I K E S P E R R L Q L S E I
250     260     270     280     290     300
241    TACCAGTGGATCGCCAACAAGTTCCTTTCTACGCCAAGGAGAGCGCCAAGGAGAAGCAG
79     Y Q W I A N K F P F Y A K E S A K E K Q
310     320     330     340     350     360
301    GGCTGGAAGAATCGATCCGGCACAACCTGAGTCTGAACGAATGTTTCCAGAAGCAGCCC
99     G W K N S I R H N L S L N E C F Q K Q P
370     380     390     400     410     420
361    CGGGATGGCGGGCGGGGAGGAAAGGGCAACTACTGGACGCTAGACCCCCAGCAGCAG
119    R D G G G G G G K G N Y W T L D P Q H E
430     440     450     460     470     480
421    AACATGTTTGAAGATGGCAACTTCACGCGCGCCGACGGATGAGACGCGCGGCTAAGCTC
139    N M F E N G N F T R R R R M R R A A N L
490     500     510     520     530     540
481    CTGCGACAGCCCTACCCCTCCCTATCCCATCTTCCAGATCTCCCCGAGCAGCAGCTGGGGG
159    L R Q P Y P P Y P I F Q I S P S S S W G
550     560     570     580     590     600
541    CTGGCCAAATCCAAGGGGGAACTTCGCGAGCTATACACAGGGCAGCGCATGCACACC
179    L G Q I Q G G N F A S Y T Q G T R M H T
610     620     630     640     650     660
601    CCGCACTCCTACACCTACCCGCAGATGAACCAGCTTCAGGGGAGATGCAGCTCGGGGC
199    P H S Y T Y P Q M N Q L Q G Q M Q L G G
670     680     690     700     710     720
661    GGCTACCAGCAGATCGGGGCTCCCTGGGCACGGCGCGCTCACTTCAGGGCCCTTGGGG
219    G Y Q Q I G G S L G T A P L T S G A L G
730     740     750     760     770     780
721    TCAAGCTTCTCCAGTCACTGGGCGGGGACTCCTGGGCAGCTCCTCGCCGGCCATTTCG
239    S S F S S H L G G G L L G S S S P A I S
790     800     810     820     830     840
781    TCCCGAGCAGCTCCACACCTCCCTCGGCACCGCGCCTGAACTCTGGACATCGGGGTCG
259    S P S S S H T S L G T A P E L W T S G S
850     860     870     880     890     900
841    AGCACAAGCCTTCACTCTAGCATCGGAGCCAGTAGTTTTTAAAGCCCAGCAGTACTTTA
279    S T S L H S S I G A S S F L S P S S T L
910     920     930     940     950     960
901    GGATCGCCTTCTACTACACCTTCCAGCCTTCTTTCCGGTAGTGGCAGCGGCGATTACGGC
299    G S P S T T P F Q P S F G S G S G S Y G
970     980     990     1000    1010    1020
961    GCGGGCTGAACGCGTGGCGCCGACAGGGAGAGGCCACAACCTCCTCCAGCTTGGCCCT
319    A G L N A C R R Q G E A T T S S Q L A P
1030    1040    1050
1021   CTCTCTACTACGGCTGGACGGATTCCAAGCCCTAA
339   L S Y Y G W T D S K P *
CAGATTTTGGACCGGACGCCTTGGCTTGGACCGCGCGGCGGAGGGGGTGACCCACACGACCTGATGA
CTGACGGGACTGACCACTCAGCGCTGGCGGCAGACTGACCACGCCACACACCTTTAATTAAGTACTGTT
ATGAAAAGCAGATGTAGGACCTCCGACTACCAAAGGAGCGAGGCCAATCTGGACAAGTAACCGAAAAGGAT
CGTAATCTGGGAAGTGAAGTAAATCATGTGCTGCGAAAATCAAATAACGAGCTGGACGACGGCGGAA

```

47

48

49

50

51

52

53

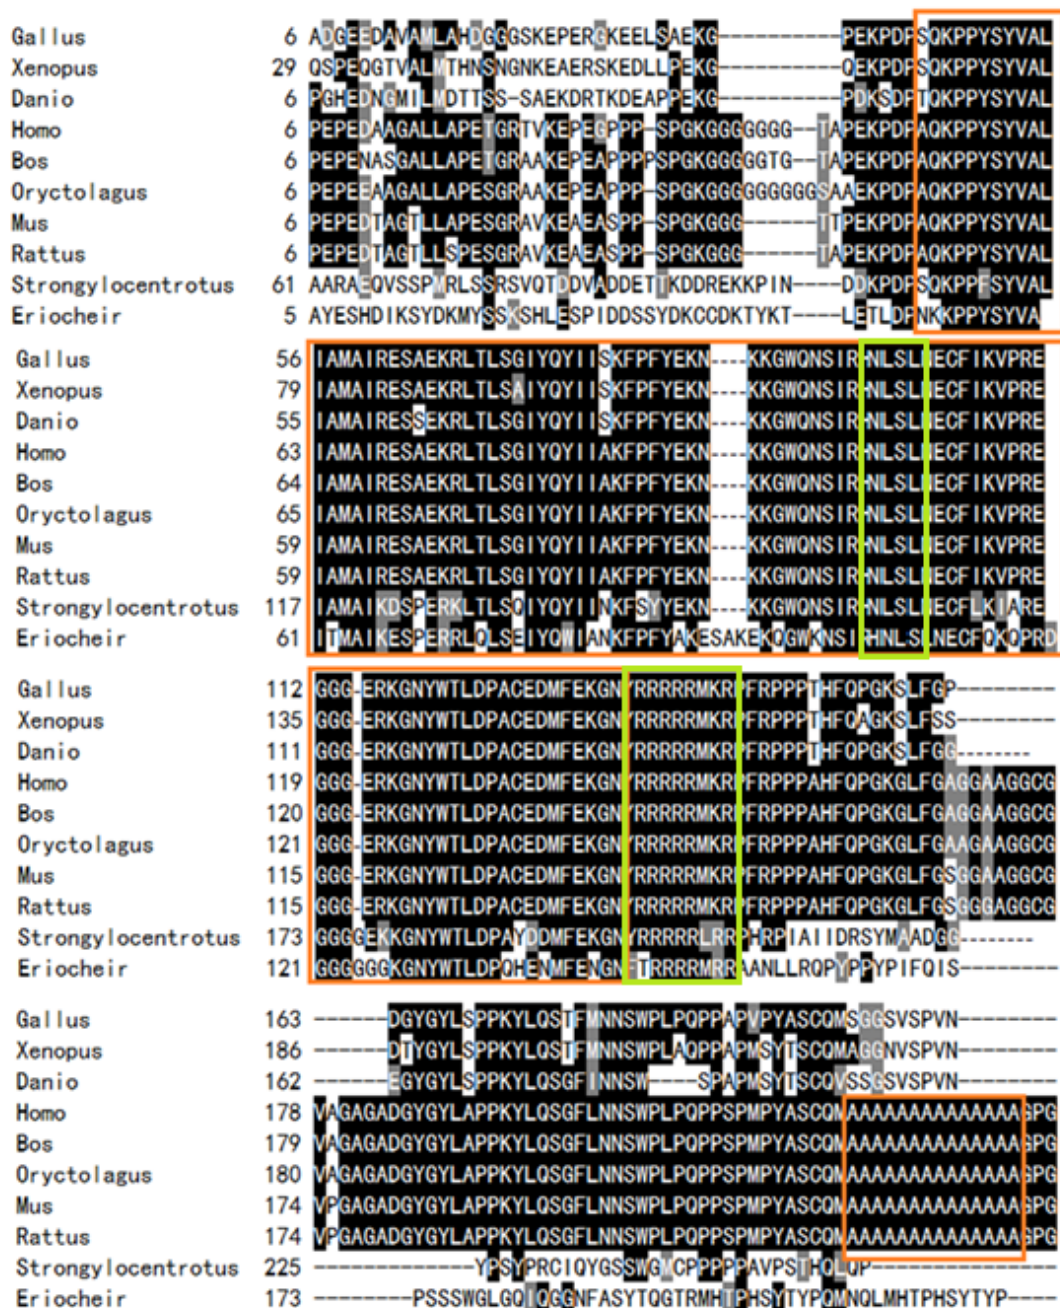

55

56

57

58

59

60

61

62

63

64

65

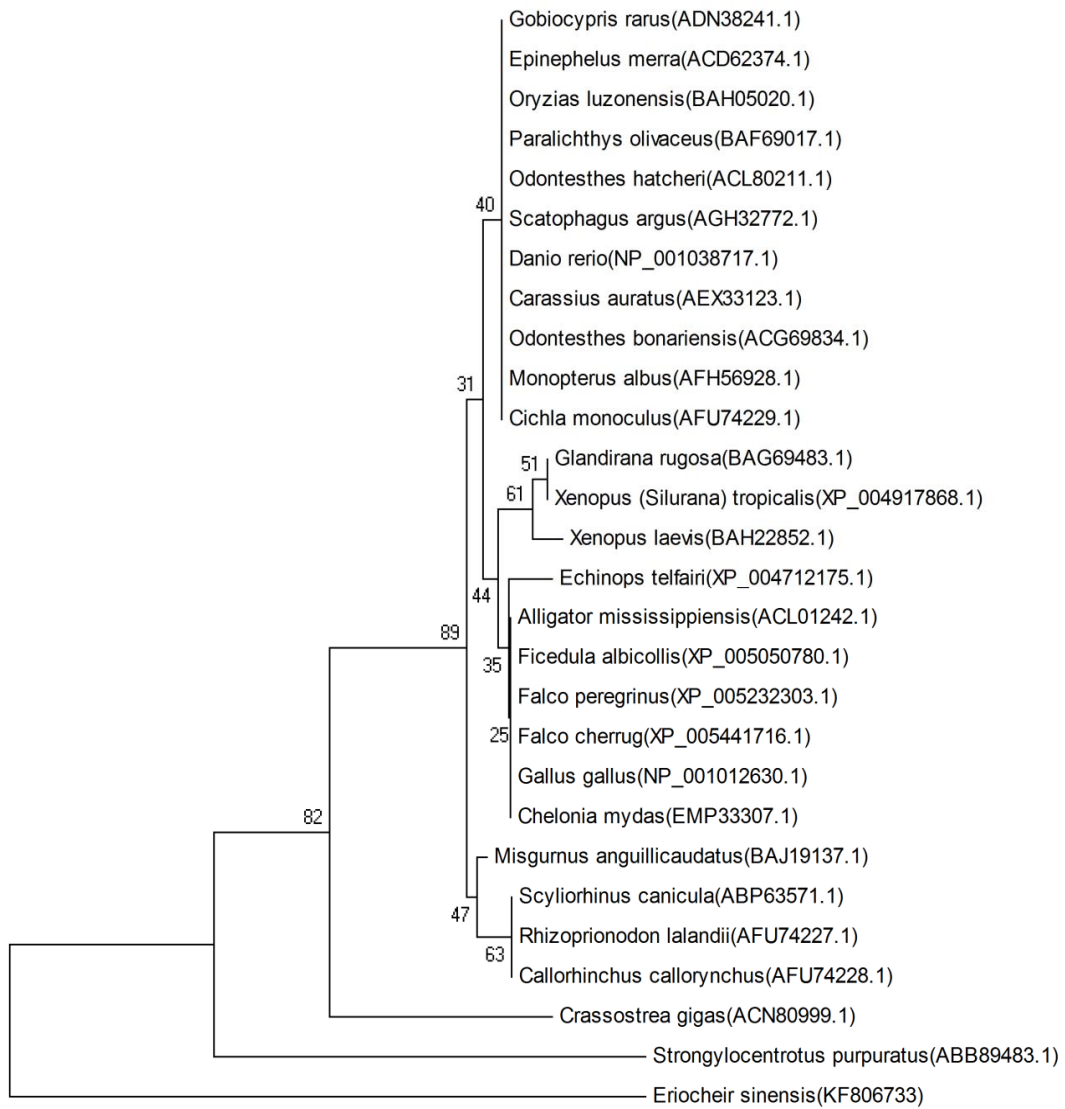

0.05

67  
68  
69  
70  
71  
72  
73  
74  
75  
76  
77  
78  
79  
80  
81

```

1      ATGGACTCTGGTCTCTTCCCGGGCGTAGCTACCACCACCTTGGACTACACCTCCTCAGC
1      M D S G L F P G V A T T T L D Y T S L T
61     GACATGCCCGACACGAAAGAGGGCATCGAGGAACATGCCCTGTGTGTGGGGACAAGGTG
21     D M P D T K E G I E E L C P V C G D K V
121    TCGGGCTACCCTACGGCCTACTCATTGTGAATCCTGCAAGGGCTTCTTCAAGAGGACG
41     S G Y H Y G L L T C E S C K G F F K R T
181    GTTCAGAACAAGAAGGTTTATACGTGTGTGCGCGACCGCTCCTGTGAGATTGATAAGACC
61     V Q N K K V Y T C V A D R S C Q I D K T
241    CAGAGGAAGAGGTGTCCGTACTGCCGCTTCCAGAAATGCTTAGAAGTGGGAATGAAACTA
81     Q R K R C P Y C R F Q K C L E V G M K L
301    GAAGCCGTGCGGGCGGACCGCATGAGGGGGCGCCGCAACAAGTTTCGGGCCCATGTACAAG
101    E A V R A D R M R G G R N K F G P M Y K
361    CGTGACCGCGCCAGGAACTGCAGATGCTGAGACAACGTCAGCTGACCCACCCCGGCAGC
121    R D R A R K L Q M L R Q R Q L T H P G S
421    CTGCTGTCCGGCGGGCGCCACCCACCACCTCGGGCGTGCCTCACGTACTCCACCCGGG
141    L L S G G R H P T T S G V A S R T P P G
481    GCTACTCCTCGGCGCCATCCACACACGTCCACATCAAGGAAGAGATCCAGAGTCCCTTCC
161    A T P R R H P H T S T S R K R S R V P S
541    TCTCCTCGTCCACATCTTTCGCCAGACTCCTCGCCGTCCCCCATGGCAATTGGGCGGCCTC
181    S P R P H L R Q T P R R P P W Q L G G L
601    GTCGCAGGCTCGGGCGGGCGTGGGCGCCTAGTGCCTCGGGCCTGTGCGACCCATCCTC
201    V A G S G G R G R P S A S G P V A P I L
661    GCTGGGCCCGATCCCGCCCTGTGGGTACCAACGCCCAATCCACGGCGGGTGGCGTAACA
221    A G P D P A L W V T N A Q S T A G G V T
721    ACGGGCACACCACCTACGGGAGGGCGTGGGCGGTGGAGGAGGAGGAGGAGGAGGCGGGG
241    T G T P P T G G R R R W R R R R R R R G
781    AGGAGGACGCACAGTACGCCCTTGTATCCCTTACCATTATCCGAGAATTGGTGGAGACC
261    R R T H S T P L Y P F T I I R E L V E T
841    GTTGACGACCAGGAGTGGCAGCGTGTGTTCTCGCTGCTGCAGAACCAGACCTACAAC
281    V D D Q E W Q A L L F S L L Q N Q T Y N
901    CAGTGCAGGTTGGACCTCTTCGAGCTGATGTGCAAAGTCCCTCGACCAGAACCTCTTCGGG
301    Q C E V D L F E L M C K V L D Q N L F A
961    CAGGTCGACTGGGCCCGGAACCTCTGTTTCTCAAAGATCTCAAGGTTGATGACCAGATG
321    Q V D W A R N S C F F K D L K V D D Q M
1021   AAGTCCTACAGCACTCTTGGTCTGACTTGTGATTCTTGACCACCTACATCAGCGCATC
341    K L L Q H S W S D L L I L D H L H Q R I
1081   CACAACAGACTGCAGGACGAGACCACGCTGCCGAATGGTCAGAAGTTCGACCTGCTGTCC
361    H N R L Q D E T T L P N G Q K F D L L S
1141   CTGGCACTGCTCGGGACCACACAGTTTGGCGACCGTTTCCACAACATCCTCAGCAAGCTT
381    L A L L G T T Q F A D R F H N I L S K L
1201   ATTGACCTCAAATTTGACGTCCCGAGTATATCTGTCTCAAGTTCGTCATCCTTCTCAAT
401    I D L K F D V P E Y I C L K F V I L L N
1261   CCAGCAGAGGTGCGACTACTGAGTGACCGGCGCTCCGTCATTACCGCACACGAGCAGGTC
421    P A E V R L L S D R R S V I T A H E Q V
1321   AAGCAGGCCCTCCTGGACTACATCGCTAACGTGTATCCTGAAGACACGGAGAAGTACCAG
441    K Q A L L D Y I A N V Y P E D T E K Y Q
1381   AAGATGATGGACCTGCTCCCCGAACCTCCACTTCATTGCCGACAACGGTGAAAAATACCTT
461    K M M D L L P E L H F I A D N G E K Y L
1441   TACTTCAAGCACATAAACGGCGTGCSCCCACGCAGACCTTGTAAATGGAGATGCTCCAC
481    Y F K H I N G A A P T Q T L L M E M L H
1501   ACTAAACGGAATAG
501    T K R K *

```

83

84

85

86

87

88

89 Supplemental Fig. S5.

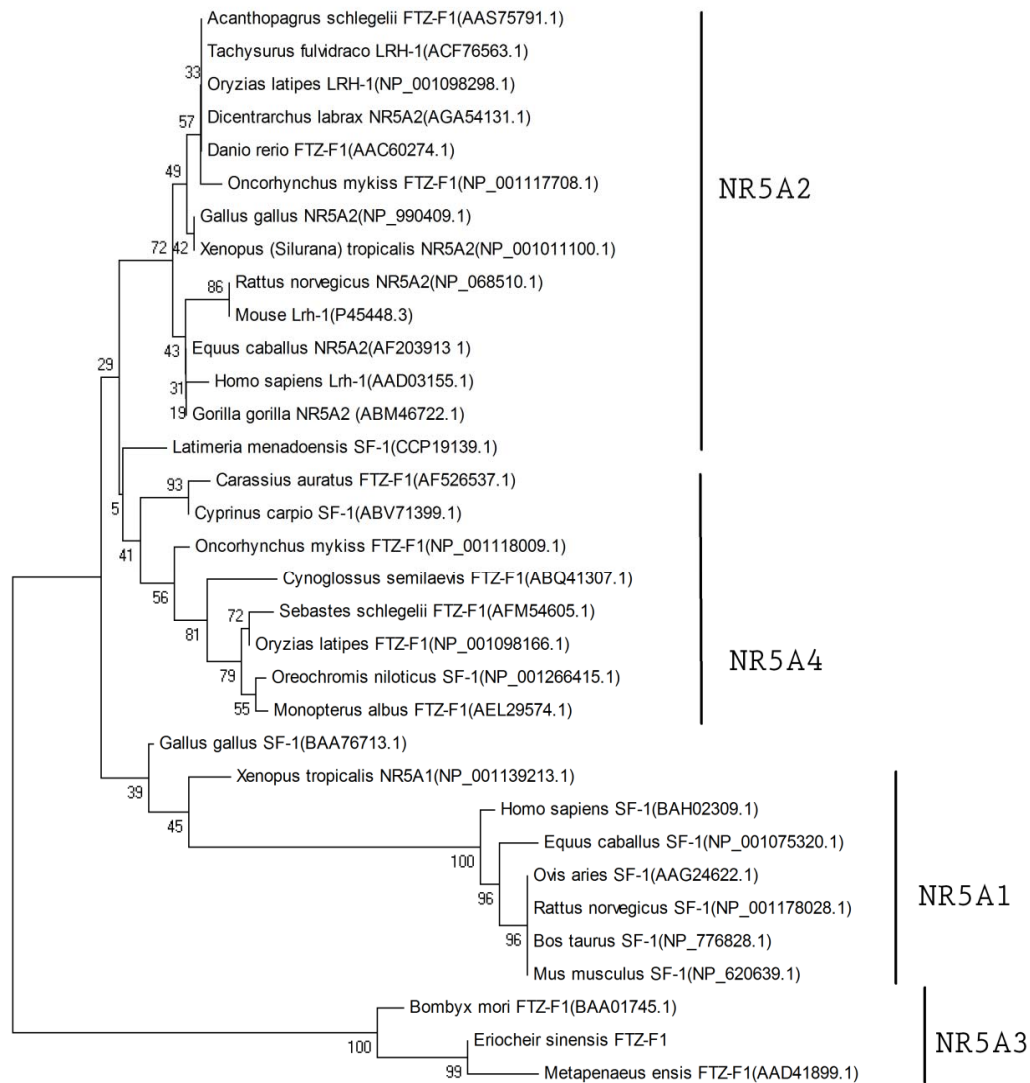

90  
91  
92  
93  
94  
95  
96  
97  
98  
99  
100  
101  
102  
103  
104  
105

```

1      CTGGCAGTGTCTCCTTCGAACCGGACAACCTCGAGAGCGGGGGCAACACCAGCATCGTGGC
1      L A V L L R T G Q L E S G R Q H Q H R G
61     GACCTGTGGGGGTTCATCGGTGTGCTTCAATCAATGTGCTGGACGGCGAGGTGTTCTCAA
21     D L W G V I G V L H Q C A G R R G G S Q
121    GTACAACCGCAGTACAAAAACCTTGCCATCCACCGCCAGCTGGCAGTGTCTCCTTGAACC
41     V Q P Q Y K N L A I H R Q L A V L L R T
181    GGACAACCTCGAGAGCGGGCCGCAACACCAGCATCGTGGCGACCTGTGGGGGTTCATCGAC
61     G Q L E S G R Q H Q H R G D L W G V I D
241    GCGGAGGTGGTTCTCAAGTACAACCGCAGTACAAAAACCTTGCCATCCACCGCCAGAGCC
81     G E V V L K Y N R S T K T L P S T A R A
301    ACCGGGGGGGAGAACCTCTATGCTCAGGTCTGGTCCACTCTTCCACTCGACGACCTCGGA
101    T A G E N L Y A Q V W S T L P L D D L G
361    CTCGAAGACCATGAACGTCTCGCTGCAGCTGGTGGCGGATCCACAGTGTCTCCTCATCCAC
121    L K T M N V L A A A G A R S T V L L I H
421    CCAGACGGGGGATATGTTACCAGATGTTCCGCACGGTCCCGAATAAGGCTGCCGCTGTG
141    P D A G I C Y Q M F R T V P N K A A A V
481    ATATGTGGCTGCTCTTCCACCTAAGAAGGGACATGGTGTGTTTGTGGTCCAGAGGAC
161    I C A L L F H P K K A T W L F C G H E D
541    GGGCAGATCCAGCTGTGGGACATTGGCACTCCACCTTACCTGAGTACGAAGTTAGCCAG
181    G Q I Q L W D I G T P T L P E Y E V S Q
601    GTGCATCTACTAACGATCCACCTGTTGGGAGAGATGTGTACAACCTGGCCTTCTCCTGC
201    V H L L T I P P V A R D V Y N L A F S C
661    ACCCAGGACCTGCTTATCGGGGCTGTGACGGTGGTCTGTACGCTTGAAGGTTGACCTG
221    T H D L L I G G C D G G L Y A W K V D L
721    AAGAAGATTGAGGCTGGGGAGAGTCTTGAGCGGCTGGAGTCTGTGCTTCCGGAGGTGGAC
241    K K I E A G E S L E R L E F V L P E V D
781    GGCAATGGCTCTGTGCTGGACTCAATCTCCATGCTGGCGATGAOCTCCTGGCTGCCAAG
261    G N G S V L D S I S M L R D D L L A A K
841    TCGCGCTGCGATGGTTCAGATCTATGTGTTCTCCGTGTCCAAGGCGCTTCCGTGGCCAAG
281    C A L H G Q I Y V F S V S K A L S V A K
901    CTTAATAAGAGTGGTCCAGCTTCAGGGGAGGTGAAGACGGAGATGATGGTGGGCTT
301    L N K S R S Q L Q A E V K T E M M V R L
961    CGGTGGAGCGACACGGACAACCTACTACATGAACATGGGGCTGGACTCTCGGTCAATGTCTA
321    R W S D T D N Y Y M N M G L D S R S C L
1021   CTGGTGTGCGGGGACGACAAGGGCGCTGTGGGTGTATGACCTCGCGACCTCGTITACG
341    L V C G D D K G A L W V Y D L A D L V T
1081   GGCAGGGCGACCTCCCCCTGACCGGGCGGCGCTCCGATCCCATGGTGGAGCCTGTCAAG
361    G R A T S P L T G G A P I P M V E P V K
1141   ATCCTGGAGTGGCTGAGCTGGAGGATGCGGAGGTGGAAAAGGCCTAAGCTTCCACTG
381    I L E W P E L E D A E V E K A R K L R L
1201   GACACGTATGACATAGTGGTTGACAAGTGCCTGTGTCCTATGGGGCCAGCACATCGTG
401    D T Y D I V V D K C T V S Y G A Q H I V
1261   GCGGTGACGTGAATAATATGGTGTGTATATGGCGACATGGGAAGGAGGAGGAGGAGG
421    A V T S N N M V C I W R H G K E E E E E
1321   GAGGAGCGGGCGGTGAAGCAGGAGGAAGCGGAGAAGGATAAAAAAAAAAAAAAAAAAAAAA
441    E E A A V K Q E E A E K D K K K K K K K
1381   AAAAAAAAAAATTCGGGTGTTTTCCCCCGGGGCCCCCAAAAAGGAAAAAAAAAAAAAAAA
461    K K K I S R C F P P G A P K K G K K K K

```

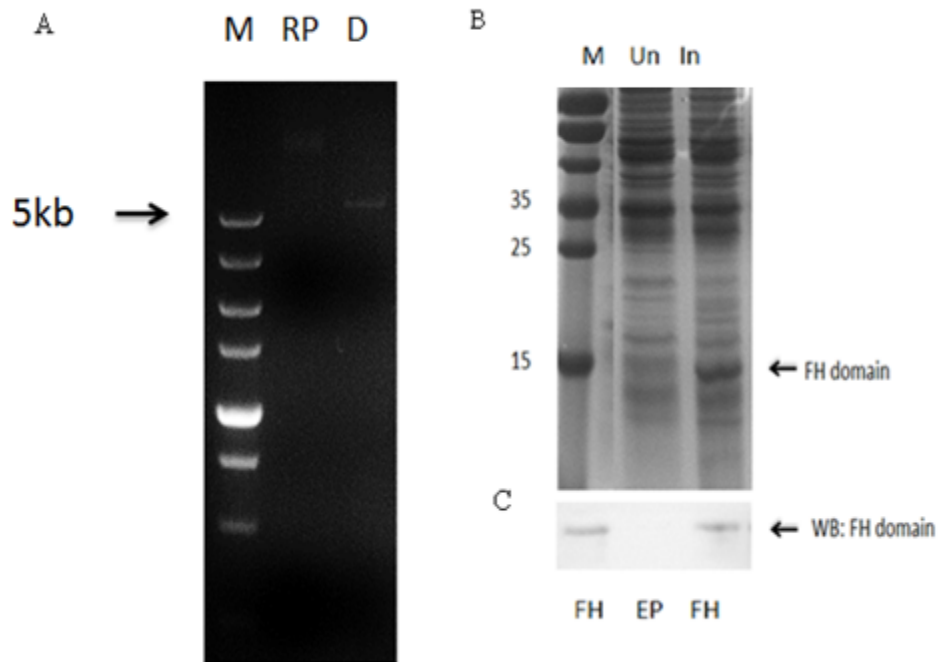

109  
110  
111  
112  
113  
114  
115  
116  
117  
118  
119  
120  
121  
122  
123  
124  
125  
126  
127  
128  
129  
130  
131  
132
